# Supplementary material
Source: MDPI journal article supplement (https://www.mdpi.com/2073-4344/8/9/399)
Supplement: s1 [file s1]

# Supplementary Materials: Performance of Mn-Fe-Ce/GO-x for Catalytic Oxidation of Hg<sup>0</sup> and Selective Catalytic Reduction of NO<sub>x</sub> in the same temperature range

Donghai An, Xiaoyang Zhang, Xingxing Cheng \*, Yong Dong \*

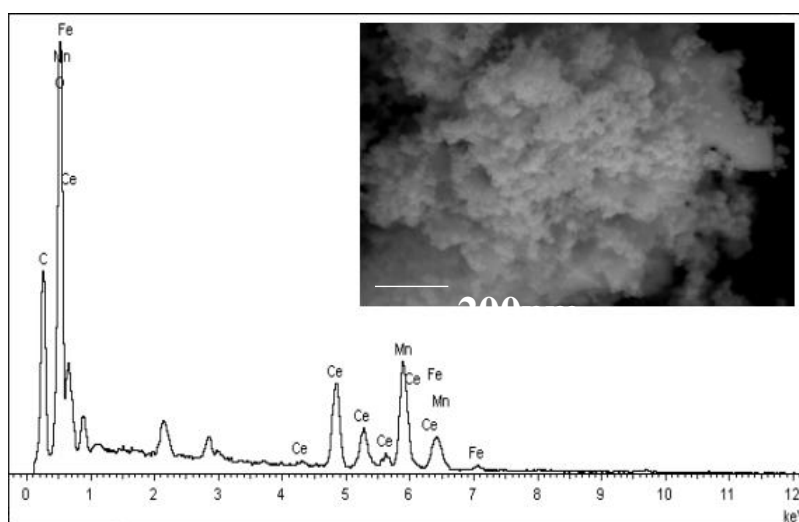

**Figure S1.** The element contents on the surface of graphene (EDS) and SEM images of Ce-Mn-Fe/GO-0.

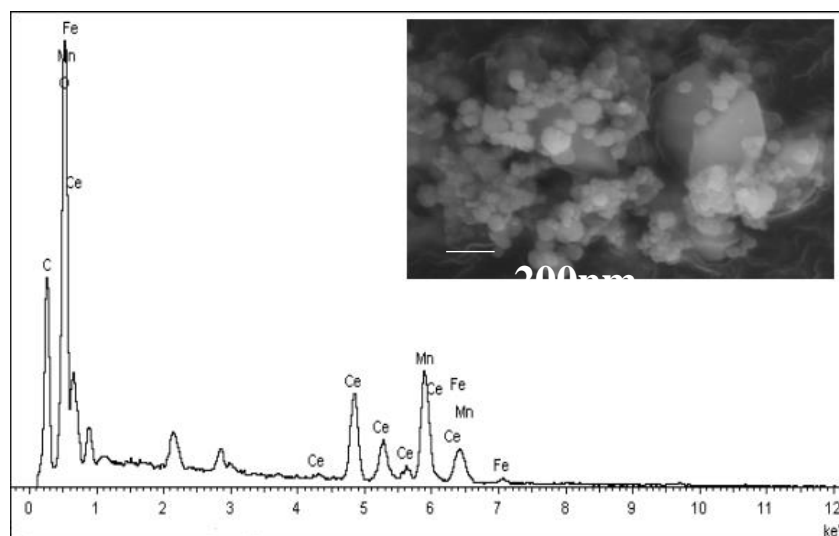

**Figure S2.** The element contents on the surface of graphene (EDS) and SEM images of Ce-Mn-Fe/GO-10%.

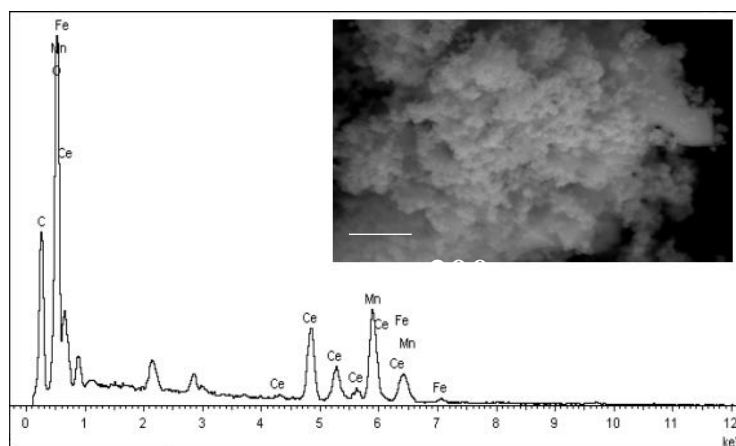

**Figure S3.** The element contents on the surface of graphene (EDS) and SEM images of Ce-Mn-Fe/GO-30%.

Figure S4 shows the activity of  $\text{NO}_x$  reduction with  $\text{NH}_3$  by Ce-Mn-Fe/GO-0, Ce-Mn-Fe/GO-10% and Ce-Mn-Fe/GO-30% composites at different temperatures. The  $\text{NO}_x$  removal efficiencies over Ce-Mn-Fe/GO- $x$  ( $x = 0, 10\%, 30\%$ ) were studied at reaction temperatures with range from 100 to 400 °C. The efficiencies of  $\text{NO}_x$  removal approximately 46%, 38% and 43% at 100 °C, respectively. For the sample of Ce-Mn-Fe/GO-0, the efficiency reaches to 84% at 150 °C, further, starting to decrease with the temperature increasing to 400 °C. The Ce-Mn-Fe/GO-10% and Ce-Mn-Fe/GO-30% obtained the highest efficiency with 81% and 80% at 200 °C and 250 °C, respectively. And then, the efficiencies decrease with increasing temperature, it is worth noting that the rate of decreases is much slower than the catalyst of Ce-Mn-Fe/GO-0, maybe the graphene has considerable effect on  $\text{NO}_x$  removal.

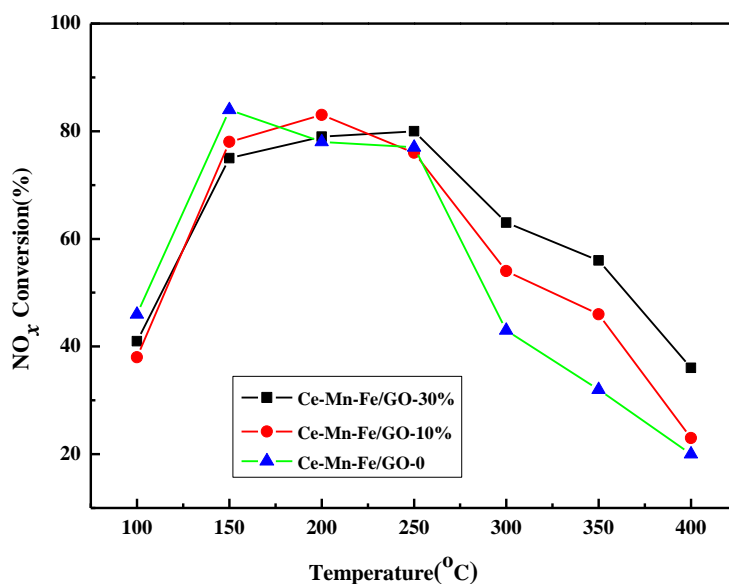

**Figure S4.**  $\text{NO}_x$  conversion as a function of reaction temperature over the Ce-Mn-Fe/GO- $x$  ( $x = 0, 10\%, 30\%$ ) samples. (Reaction conditions: 800 ppm  $\text{NO}$ , 800 ppm  $\text{NH}_3$ , 6%  $\text{O}_2$  and  $\text{N}_2$  balance).

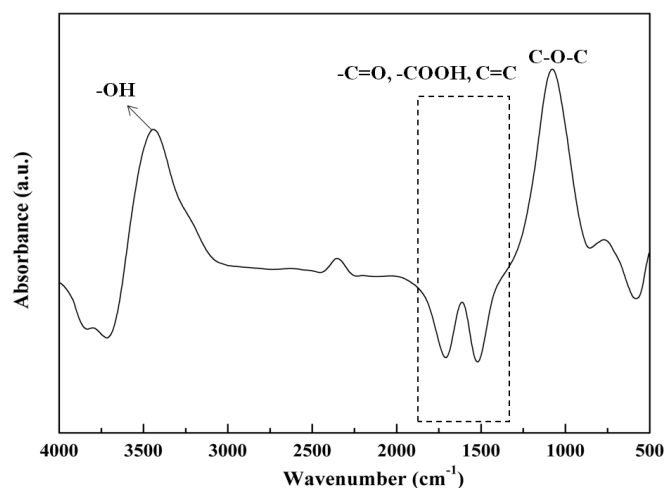

**Figure S5.** Fourier transform infrared spectra of GO.

As the Figure S5 shown, the peaks at 3600–3200  $\text{cm}^{-1}$  are assigned to the -OH stretching vibrations of alcohol, phenol and water [1]. The peaks at 1700–1585  $\text{cm}^{-1}$  are assigned to the C=O stretching vibrations of carbonyl and the C=C stretching vibrations of benzene; the peaks at 1440–1395  $\text{cm}^{-1}$  are assigned to the C=O stretching vibrations of carboxyl; and the peaks at 1200–1000  $\text{cm}^{-1}$  are assigned to the C-O-C stretching vibrations of alcohol, ether and anhydride [2].

## References

- Jeong, H.-K.; Lee, Y.P.; Jin, M.H.; Kim, E.S.; Bae, J.J.; Lee, Y.H. Thermal stability of graphite oxide. *Chem. Phys. Lett.* **2009**, *470*, 255–258.
- Ding, S.; Li, Y.; Zhu, T.; Guo, Y. Regeneration performance and carbon consumption of semi-coke and activated coke for  $\text{SO}_2$  and NO removal. *J. Environ. Sci.* **2015**, *34*, 37–43.
